# Supplementary material
Source: PubMed Central journal article supplement (PMC7051017)
Supplement: NIHMS1066852-supplement-Appendices.pdf [file NIHMS1066852-supplement-Appendices.pdf]

**APPENDIX. Alternative Specifications of Each Outcome**

**Appendix Table 1. Multilevel Models of Cumulative Biological Risk, Poisson Specification**

|                                   | Model 1 |         |                  | Model 2  |         |     | Model 3 |         |     | Model 4 |         |     | Model 5  |         |     |
|-----------------------------------|---------|---------|------------------|----------|---------|-----|---------|---------|-----|---------|---------|-----|----------|---------|-----|
| <i>Fixed Effects</i> <sup>a</sup> | Women   | Men     | <sup>b</sup> m≠w | Women    | Men     | m≠w | Women   | Men     | m≠w | Women   | Men     | m≠w | Women    | Men     | m≠w |
| Constant                          | .283*** | -.027   | †                | .428***  | -.145   | †   | .270*** | -.037   |     | .292*** | -.019   | †   | .405***  | -.156   | †   |
| Skin Color (ref. Light)           |         |         |                  |          |         |     |         |         |     |         |         |     |          |         |     |
| Medium                            | .150**  | -.078   | †                | .131*    | -.074   | †   | .152**  | -.075   | †   | .150**  | -.082   | †   | .134*    | -.074   | †   |
| Dark                              | .371*** | .037    | †                | .329***  | .050    | †   | .370*** | .040    | †   | .373*** | .032    | †   | .332***  | .049    | †   |
| Socioeconomic Characteristics     |         |         |                  |          |         |     |         |         |     |         |         |     |          |         |     |
| Some College                      |         |         |                  | -.012    | .041    |     |         |         |     |         |         |     | -.011    | .041    |     |
| College or More                   |         |         |                  | -.269*** | -.028   | †   |         |         |     |         |         |     | -.260*** | -.030   | †   |
| Income                            |         |         |                  | -.016    | .010    |     |         |         |     |         |         |     | -.015    | .011    |     |
| Married                           |         |         |                  | .061     | .113    |     |         |         |     |         |         |     | .061     | .114*   |     |
| Chronic Burdens                   |         |         |                  |          |         |     | .038    | .030    |     |         |         |     | .044     | .043    |     |
| Discrimination                    |         |         |                  |          |         |     |         |         |     | -.066   | -.032   |     | -.046    | -.047   |     |
| Age                               | .036*** | .036*** |                  | .036***  | .036*** |     | .036*** | .037*** |     | .035*** | .036*** |     | .037***  | .036*** |     |
| <i>Random Effects</i>             |         |         |                  |          |         |     |         |         |     |         |         |     |          |         |     |
| Subject-Specific                  | .611*** | .661*** |                  | .591***  | .659*** |     | .609*** | .661*** |     | .610*** | .660*** |     | .588***  | .658*** |     |
| Random Error                      |         |         |                  |          |         |     |         |         |     |         |         |     |          |         |     |
| N                                 | 984     | 696     |                  | 984      | 696     |     | 984     | 696     |     | 984     | 696     |     | 984      | 696     |     |

<sup>a</sup>All models control for health insurance and proportion of waves missing; logged counts are presented

<sup>b</sup>'m≠w' indicates Chow tests for differences between men and women

\*  $p < 0.05$ , \*\*  $p < 0.01$ , \*\*\*  $p < 0.001$

† indicates a statistically significant ( $p < 0.05$ ) difference in coefficients for men and women

**Appendix Table 2. Multilevel Models of Self-Rated Health, Ordinal Specification**

|                                     | Model 1  |          | Model 2   |          | Model 3  |          | Model 4  |          | Model 5   |          |
|-------------------------------------|----------|----------|-----------|----------|----------|----------|----------|----------|-----------|----------|
| <i>Fixed Effects</i> <sup>a,b</sup> | Women    | Men      | Women     | Men      | Women    | Men      | Women    | Men      | Women     | Men      |
| Skin Color (ref., Light)            |          |          |           |          |          |          |          |          |           |          |
| Medium                              | .234     | -.093    | .123      | -.232    | .276     | -.033    | .240     | -.053    | .167      | -.159    |
| Dark                                | .620*    | -.092    | .388      | -.343    | .617**   | -.033    | .614**   | -.041    | .380      | -.263    |
| Socioeconomic Characteristics       |          |          |           |          |          |          |          |          |           |          |
| Some College                        |          |          | -.433**   | -.239    |          |          |          |          | -.490***  | -.299    |
| College or More                     |          |          | -1.098*** | -.598*   |          |          |          |          | -1.228*** | -.723**  |
| Income                              |          |          | -.183***  | -.220*** |          |          |          |          | -.153***  | -.205*** |
| Married                             |          |          | -.079     | .073     |          |          |          |          | -.078     | .065     |
| Chronic Burdens                     |          |          |           |          | .730***  | .619***  |          |          | .661***   | .579***  |
| Discrimination                      |          |          |           |          |          |          | .319*    | .409*    | .283*     | .318*    |
| Age                                 | .060***  | .045***  | .063***   | .047***  | .074***  | .056***  | .064***  | .049***  | .078***   | .061***  |
| <i>Random Effects</i>               |          |          |           |          |          |          |          |          |           |          |
| Subject-Specific Random Error       | 4.923*** | 5.637*** | 4.296***  | 5.256*** | 5.016*** | 5.273*** | 4.895*** | 5.559*** | 3.916***  | 4.884*** |
| N                                   | 979      | 696      | 979       | 696      | 979      | 696      | 979      | 696      | 979       | 696      |

<sup>a</sup>All models control for health insurance, medication use, and proportion of waves missing; logged odds are presented

<sup>b</sup>Analyses indicate that Chow tests for differences between men and women are not significant

\*  $p < 0.05$ , \*\*  $p < 0.01$ , \*\*\*  $p < 0.001$
